# Supplementary material for: Is the Non-Coding RNA miR-195 a Biodynamic Marker in the Pathogenesis of Head and Neck Squamous Cell Carcinoma? A Prognostic Meta-Analysis
Source: MDPI journal article supplement (doi:10.3390/jpm13020275), 2023-01-31
Supplement: s1 [file s1]

"cutoff value" in relation to the "p-values":

13 0.462087469662889  
13 0.425910482743201  
13 0.504088415911796  
13 0.596210102380106  
13 0.664766293155924  
13 0.62012607872158  
13 0.709985741502504  
13 0.653858326841281  
13 0.7737775052278  
13 0.896723044135075  
13 0.814551772645132  
13 0.721930581682705  
13 0.675971732875581  
13 0.632651085006734  
13 0.746187241228819  
13 0.851725290589604  
13 0.824669097211427  
14 0.778125904990256  
14 0.732128123290961  
14 0.719590729015675  
14 0.838899621702853  
14 0.918267121626508  
14 0.89098742709557  
14 0.818431244980301  
14 0.909464501609736  
14 0.951553331929768  
14 0.857602276322061  
14 0.981621572400742  
14 0.927803284834511  
14 0.992176572920455  
14 0.912081327503292  
14 0.954880069518734  
15 0.894276012373776  
15 0.96567293295303  
15 0.969198709946474  
15 0.891500903302076  
15 0.959696615387007  
15 0.928688534742065  
15 0.865678329571579  
15 0.921593813108529  
15 0.968650112976812  
15 0.983410312005387  
15 0.960512633360418  
15 0.91759972464082  
16 0.949258124001711  
16 0.953572032330212  
16 0.973161694315339  
16 0.910179456580133  
16 0.80806753237727  
16 0.829528282443271  
16 0.90298786639434  
16 0.994040949196432  
16 0.915471846282425  
16 0.978371292464373  
16 0.914689390650638  
16 0.797414907634396  
16 0.7461939478993  
16 0.805486419155215  
16 0.849656835263971  
16 0.895499894222458  
16 0.849875091205061

16 0.938820158311509  
17 0.952083730288526  
17 0.956993318339619  
17 0.98821653898596  
17 0.976817487901753  
17 0.946185394278755  
17 0.896891433331776  
17 0.997025756658378  
17 0.923419865751729  
17 0.972884613902202  
17 0.984025882750667  
17 0.916790902446418  
17 0.860141622809037  
17 0.783951016976704  
17 0.832789511996894  
17 0.800110830514341  
17 0.753280984200387  
17 0.813439562394325  
17 0.878435399534828  
17 0.947625109066677  
17 0.997779098193164  
17 0.892074927157621  
17 0.979162968684596  
17 0.873678102527018  
17 0.90347072330321  
17 0.814885013811697  
17 0.736943356835522  
17 0.761902745269021  
17 0.831570069090017  
18 0.762866000773705  
18 0.769272708561366  
18 0.69571603664708  
18 0.715378753685047  
18 0.716421556458804  
18 0.633354628883582  
18 0.540248263108171  
18 0.615091656432987  
18 0.543402945473439  
18 0.460554499153545  
18 0.472921909000327  
18 0.49028968635386  
18 0.432927472829214  
18 0.474174552829142  
18 0.49292352006808  
18 0.553533755264755  
18 0.591542061212404  
18 0.502721907615822  
19 0.471192718949201  
19 0.499090012110265  
19 0.537404061628902  
19 0.583109192374418  
19 0.6481026513395  
19 0.727508484749359  
19 0.809674721937089  
19 0.872721988995735  
19 0.934860135147672  
19 0.989563173882055  
19 0.885264176106509  
19 0.970171203450557  
19 0.864353249823169  
19 0.788102570148522  
19 0.804651278348997  
19 0.850116376002514

19 0.897521999198708  
19 0.982329226930959  
19 0.972607578407841  
19 0.965487938174857  
19 0.998722911857846  
19 0.960016549570145  
19 0.884835267340147  
20 0.994208509462984  
20 0.92458153382108  
20 0.815701270093897  
20 0.885720225892667  
20 0.830892092184974  
20 0.873798028750686  
20 0.958090580410115  
20 0.977356116811371  
20 0.94253093629019  
20 0.878417817550652  
20 0.831964732753656  
20 0.750388306661412  
20 0.79356500170537  
20 0.713187343720994  
20 0.646861004660805  
20 0.627229250284711  
20 0.582721306200946  
20 0.512290534132944  
20 0.503575694326855  
20 0.438480589779543  
21 0.488264734478728  
21 0.424260390009123  
21 0.373575844133433  
21 0.332179241394987  
21 0.294762672653427  
21 0.354068018989371  
21 0.4318438837083  
21 0.372231370264408  
21 0.330285611736803  
21 0.302913238369919  
21 0.276308690902306  
22 0.253995127667951  
22 0.312785120952093  
22 0.28779768814318  
22 0.255295335935838  
22 0.223155581753597  
22 0.20161515423226  
22 0.172521578264899  
22 0.169364444082335  
22 0.147236574379316  
22 0.170548359499805  
22 0.185989127755908  
22 0.203681609329426  
22 0.17463264268014  
23 0.153983420892361  
23 0.17790425003208  
23 0.159682135773768  
23 0.199569279437766  
23 0.170818901084265  
23 0.217332889175328  
23 0.270557147814715  
23 0.239669424839207  
23 0.198994273396997  
23 0.247715511473687  
23 0.219869085551346  
23 0.235902674559757

23 0.20706993546064  
23 0.185826737927498  
24 0.170318525419844  
24 0.164557565805784  
24 0.143837319274664  
24 0.129381971495174  
24 0.157702420098343  
24 0.127715224051276  
24 0.107568243608956  
24 0.0853687892610103  
24 0.0773078800768783  
24 0.102761205539523  
24 0.128701574863768  
25 0.157444647281186  
25 0.194789174176338  
25 0.164930550122968  
25 0.212118686704643  
25 0.255693544752785  
25 0.309406939640458  
25 0.330932360874808  
25 0.388433597039747  
26 0.361389268768912  
26 0.319886095226998  
26 0.279455525263102  
26 0.340672755562005  
26 0.403162826800084  
26 0.475210612333572  
26 0.447421687519076  
26 0.534852968544752  
26 0.463901435514211  
26 0.398229041537374  
26 0.466777044626207  
26 0.453653835612638  
26 0.444195486884586  
26 0.484496468583544  
26 0.568220798330985  
26 0.629523151808852  
26 0.692337456769235  
26 0.661992954797019  
26 0.739370671814742  
27 0.674427419802945  
27 0.781823701759715  
27 0.696565285747537  
27 0.62001678079817  
27 0.570325376179685  
27 0.564135929245461  
27 0.489301279794835  
27 0.549902027765911  
27 0.475683777117463  
27 0.558716589947049  
27 0.516079574444971  
27 0.505641123138214  
27 0.502550280249021  
27 0.571977387638614  
28 0.667597518413323  
28 0.618209527664  
28 0.705632482127391  
28 0.633373755646696  
28 0.561202649683282  
28 0.633581556178017  
28 0.724051534347813  
28 0.721331799163669  
28 0.689703854330811

28 0.77482218613734  
29 0.722016329388859  
29 0.79022660487407  
29 0.866894484444422  
29 0.928067971147883  
29 0.874490265091104  
29 0.81164545952196  
29 0.905259722540206  
29 0.989417373308441  
29 0.922928052797476  
29 0.875896128511295  
29 0.999680278699658  
29 0.895894716503247
